# Supplementary material for: Impact of Taste on Food Choices in Adolescence—Systematic Review and Meta-Analysis
Source: MDPI journal article supplement (doi:10.3390/nu12071985), 2020-07-03
Supplement: s1 [file s1]

**Supplementary Table S1.** Number of papers for each taste based on phenotype or genotype classification.

| Taste  | Phenotype             | Genotype             |
|--------|-----------------------|----------------------|
| Bitter | 5 cohorts in 7 papers | 4 cohort in 6 papers |
| Sweet  | 4 cohorts in 5 papers | 2 studies            |
| Fat    | 0                     | 1 study              |
| Salty  | 0                     | 0                    |
| Sour   | 0                     | 0                    |
| Umami  | 0                     | 0                    |

**Supplementary Table S2.** Genes and SNPs associated with each taste.

| Taste  | Gene    | SNPs                                |
|--------|---------|-------------------------------------|
| Bitter | TAS2R38 | rs713598<br>rs10246939<br>rs1726866 |
| Sweet  | TAS1R2  | rs9701796<br>rs35874116             |
|        | TAS1R3  | rs35744813                          |
|        | GNAT3   | rs7792845                           |
| Fat    | CD36    | rs1761667                           |

**Table 3.** Most frequently reported food based on taste qualities.

| Food categories/ Taste    |        | Bitter    |          | Sweet     |          | Fatty     |          |
|---------------------------|--------|-----------|----------|-----------|----------|-----------|----------|
|                           |        | Phenotype | Genotype | Phenotype | Genotype | Phenotype | Genotype |
| Total Brassica vegetables | Pref.  | 0         | 0        | 0         | 0        | 0         | 0        |
|                           | intake | 0         | 1        | 0         | 0        | 0         | 0        |
| Bitter green vegetables.  | Pref.  | 0         | 0        | 0         | 0        | 0         | 0        |
|                           | intake | 1         | 1        | 0         | 0        | 0         | 0        |
| Cauliflower               | Pref.  | 2         | 1        | 0         | 0        | 0         | 0        |
|                           | intake | 0         | 0        | 0         | 0        | 0         | 0        |
| Bitter gourd              | Pref.  | 1         | 0        | 0         | 0        | 0         | 0        |
|                           | intake | 0         | 0        | 0         | 0        | 0         | 0        |
| Cabbage                   | Pref.  | 3         | 1        | 0         | 0        | 0         | 0        |
|                           | intake | 0         | 0        | 0         | 0        | 0         | 0        |
| Brussels sprouts          | Pref.  | 2         | 1        | 0         | 0        | 0         | 0        |
|                           | intake | 0         | 0        | 0         | 0        | 0         | 0        |
| Broccoli                  | Pref.  | 2         | 1        | 0         | 0        | 0         | 0        |
|                           | intake | 0         | 0        | 0         | 0        | 0         | 0        |
| Other vegetables          | Pref.  | 1         | 0        | 0         | 0        | 0         | 0        |
|                           | intake | 0         | 1        | 0         | 0        | 0         | 0        |
| Coffee                    | Pref.  | 3         | 0        | 0         | 0        | 0         | 0        |
|                           | intake | 0         | 0        | 0         | 0        | 0         | 0        |
| Dark chocolate            | Pref.  | 1         | 0        | 0         | 0        | 0         | 0        |
|                           | intake | 0         | 0        | 0         | 0        | 0         | 0        |
| Fruit                     | Pref.  | 1         | 0        | 1         | 0        | 0         | 0        |
|                           | intake | 0         | 1        | 0         | 0        | 0         | 0        |
| Meats                     | Pref.  | 1         | 0        | 0         | 0        | 0         | 0        |
|                           | intake | 0         | 1        | 0         | 0        | 0         | 0        |

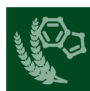

|              |        |   |   |   |   |   |   |
|--------------|--------|---|---|---|---|---|---|
| Cake         | Pref.  | 1 | 0 | 0 | 0 | 0 | 0 |
|              | intake | 0 | 1 | 0 | 0 | 0 | 0 |
| Candy        | Pref.  | 1 | 0 | 0 | 0 | 0 | 0 |
|              | intake | 0 | 0 | 0 | 0 | 0 | 0 |
| Donut        | Pref.  | 1 | 0 | 0 | 0 | 0 | 0 |
|              | intake | 0 | 0 | 0 | 0 | 0 | 0 |
| Honey        | Pref.  | 1 | 0 | 0 | 0 | 0 | 0 |
|              | intake | 0 | 0 | 0 | 0 | 0 | 0 |
| Ice cream    | Pref.  | 1 | 0 | 0 | 0 | 0 | 0 |
|              | intake | 0 | 1 | 0 | 0 | 0 | 0 |
| Margarine    | Pref.  | 1 | 0 | 0 | 0 | 0 | 0 |
|              | intake | 0 | 0 | 0 | 0 | 0 | 0 |
| Butter       | Pref.  | 0 | 0 | 0 | 0 | 0 | 0 |
|              | intake | 1 | 1 | 0 | 0 | 0 | 0 |
| Fat/oil      | Pref.  | 0 | 0 | 0 | 0 | 0 | 1 |
|              | intake | 0 | 0 | 0 | 0 | 0 | 0 |
| Mayonnaise   | Pref.  | 2 | 0 | 0 | 0 | 0 | 0 |
|              | intake | 0 | 0 | 0 | 0 | 0 | 0 |
| Milks        | Pref.  | 1 | 0 | 0 | 0 | 0 | 0 |
|              | intake | 0 | 2 | 0 | 0 | 0 | 0 |
| Sugar        | Pref.  | 1 | 1 | 1 | 0 | 0 | 0 |
|              | intake | 1 | 1 | 0 | 2 | 0 | 1 |
| Salty food   | Pref.  | 1 | 0 | 0 | 0 | 0 | 0 |
|              | intake | 0 | 0 | 0 | 0 | 0 | 0 |
| Sour food    | Pref.  | 1 | 0 | 0 | 0 | 0 | 0 |
|              | intake | 0 | 0 | 0 | 0 | 0 | 0 |
| Chilli/spicy | Pref.  | 1 | 0 | 0 | 0 | 0 | 0 |
|              | intake | 0 | 0 | 0 | 0 | 0 | 0 |

**Supplementary Table S4.** Food likes and dislikes based on taste.

| Bitter | Taster      | Food-liked                                                       | Food-disliked                                        |
|--------|-------------|------------------------------------------------------------------|------------------------------------------------------|
|        |             | * Sweet-tasting food (e.g. Sugar) [28,34]                        | * Black coffee                                       |
|        |             | * Salty and sour food (e.g. condiments and sauces)               | * Dark chocolate                                     |
|        |             | * Umami and fried food (meat products and fried chicken)         | * Chilli peppers                                     |
|        | Non-tasters | Food-liked                                                       | Food-disliked                                        |
|        |             | * Cruciferous vegetables (e.g. brussels sprouts and cauliflower) | * Cruciferous vegetables (e.g. cabbage and broccoli) |
|        |             |                                                                  | Nothing reported                                     |
